# Supplementary material for: Pd/Ag and Pd/Au bimetallic nanocatalysts on mesoporous silica for plasmon-mediated enhanced catalytic activity under visible light irradiation
Source: Royal Society of Chemistry journal article supplement (doi:10.1039/c6ta01664b), 2016-01-01
Supplement: c6ta01664b1.pdf [file c6ta01664b1.pdf]

## Supporting information

# Pd/Ag and Pd/Au bimetallic nanocatalysts on mesoporous silica for plasmon-mediated enhanced catalytic activity under visible light irradiation

Priyanka Verma,<sup>[a]</sup> Yasutaka Kuwahara,<sup>[a,b]</sup> Kohsuke Mori,<sup>[a,b,c]</sup>  
and Hiromi Yamashita<sup>\*[a,b]</sup>

### AUTHOR ADDRESS:

<sup>[a]</sup> Division of Materials and Manufacturing Science, Graduate School of Engineering,  
Osaka University, 2-1 Yamadaoka, Suita, Osaka 565-0871, Japan.

E-mail: [yamashita@mat.eng.osaka-u.ac.jp](mailto:yamashita@mat.eng.osaka-u.ac.jp);

*Fax:* +81-6-6879-7457; *Tel:* +81-6-6879-7457

<sup>[b]</sup> Elements Strategy Initiative for Catalysts & Batteries Kyoto University, ESICB,  
Kyoto University, Katsura, Kyoto 615-8520, Japan

<sup>[c]</sup> JST, PRESTO, 4-1-8 Honcho, Kawaguchi, Saitama, 332-0012 (Japan)

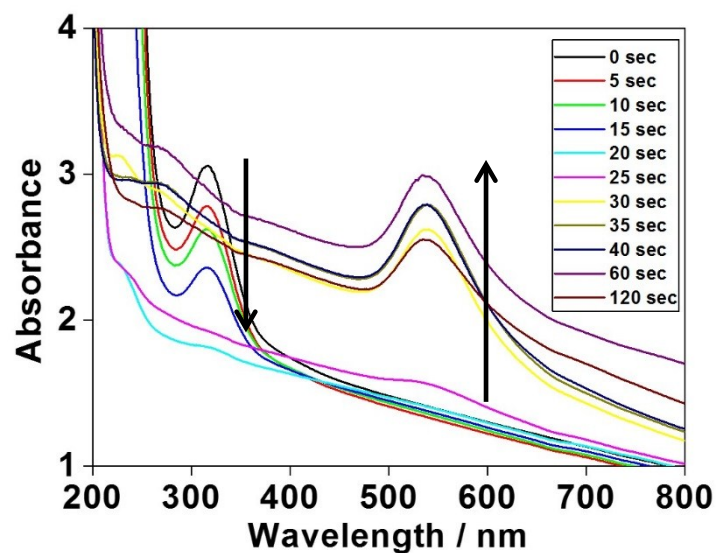

**Figure S1.** Time evolution of MW irradiation for the reduction of HAuCl<sub>4</sub> to Au NPs on a mesoporous silica support

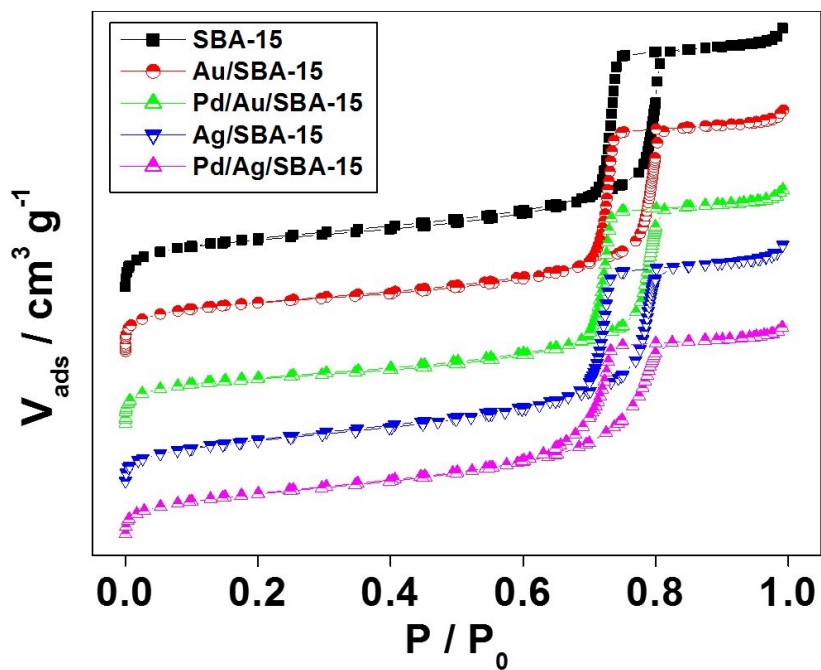

**Figure S2.** N<sub>2</sub> adsorption-desorption isotherms performed at 77 K for SBA-15, M/SBA-15 and Pd/M/SBA-15 catalysts (M=Au, Ag).

**Table S1.** Textural properties of the prepared catalysts

| Catalyst     | Mesopore volume (cm <sup>3</sup> g <sup>-1</sup> ) | BET surface area (m <sup>2</sup> g <sup>-1</sup> ) |
|--------------|----------------------------------------------------|----------------------------------------------------|
| SBA-15       | 1.32                                               | 756                                                |
| Au/SBA-15    | 1.21                                               | 668                                                |
| Pd/Au/SBA-15 | 1.18                                               | 642                                                |
| Ag/SBA-15    | 1.24                                               | 717                                                |
| Pd/Ag/SBA-15 | 1.10                                               | 692                                                |

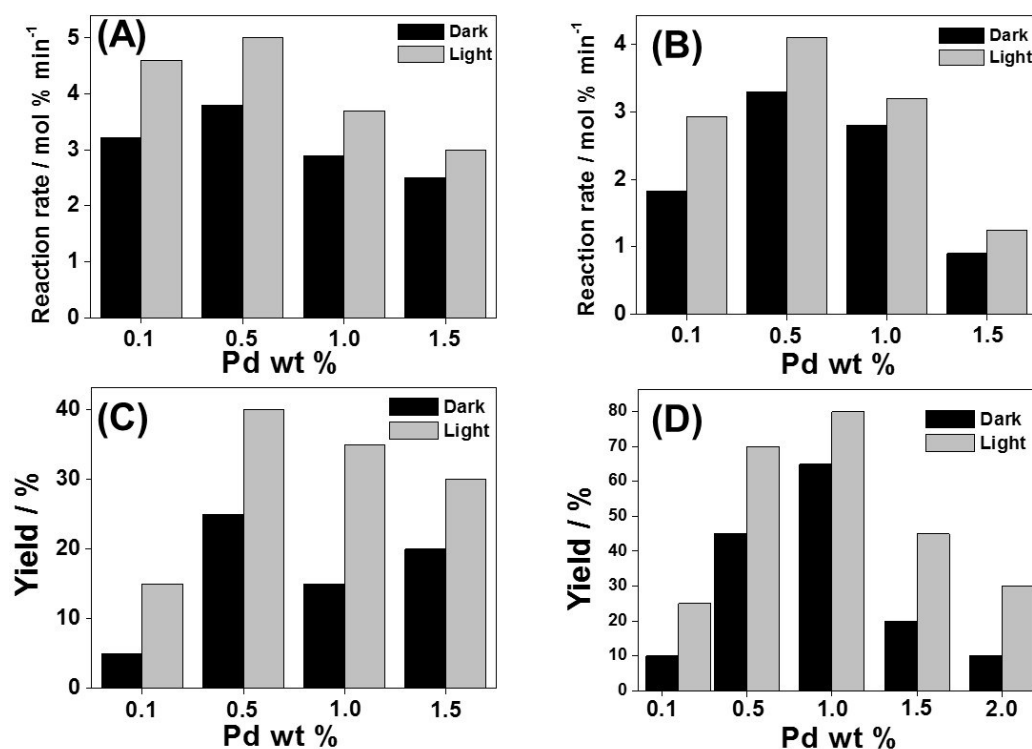

**Figure S3.** Optimization reactions for AB dehydrogenation (A) Pd on Ag, (B) Pd on Au and Suzuki coupling reaction (C) Pd on Ag, (D) Pd on Au.

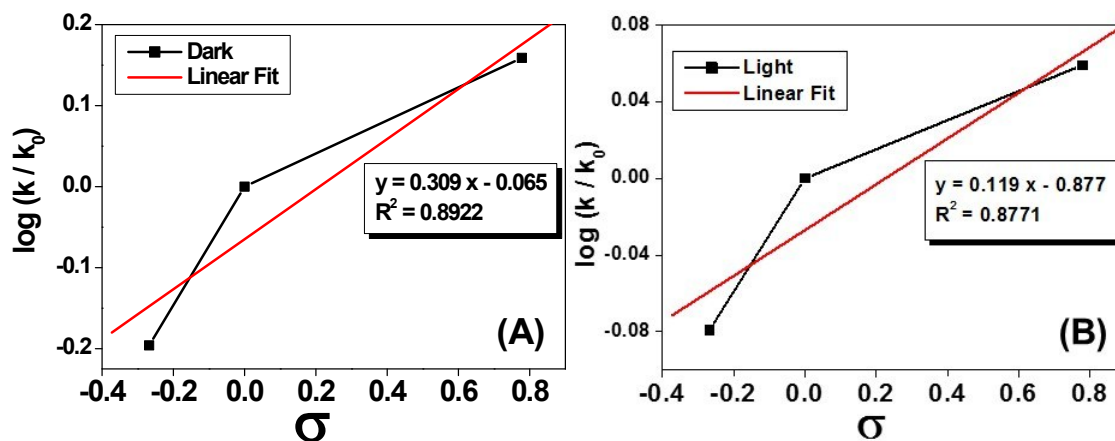

**Figure S4.** Hammett plot corresponding to Suzuki Miyaura coupling reaction for substituted iodobenzene under (A) Dark and (B) visible light irradiation

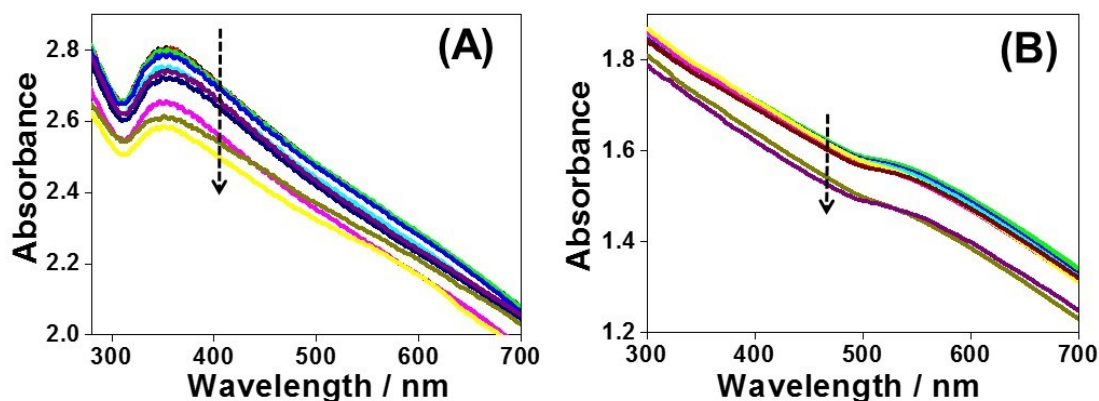

**Figure S5.** UV-vis spectra of (A) Pd/Ag/SBA-15 and (B) Pd/Au/SBA-15 as a result of electron injection experiments.

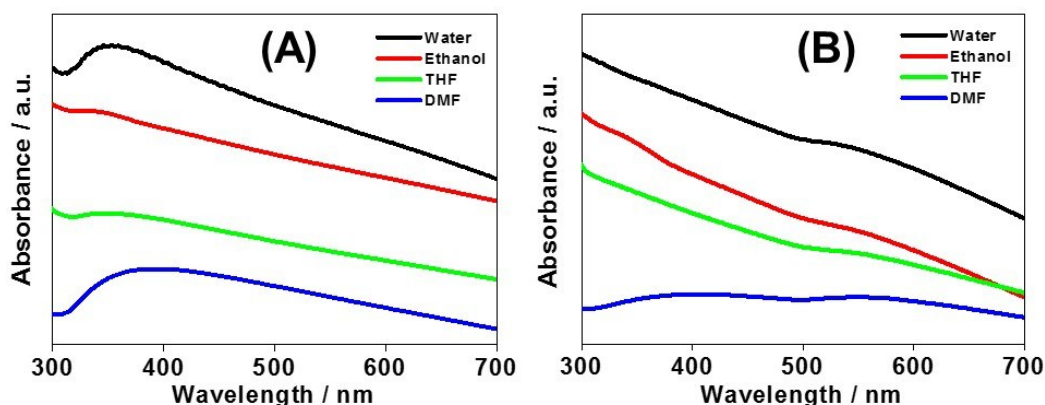

**Figure S6.** Effect of refractive index of solvent on plasmonic wavelength for (A) Pd/Ag/SBA-15 and (B) Pd/Au/SBA-15

### Section S1. Tunability Experiments

- a) **Tunability by electron injection:** Tunability by electron injection was measured by in-situ UV-vis spectroscopy measurements. The reaction was carried out in quartz cell by adding 5 mg of plasmonic catalyst (M/SBA-15) and 2.5 mL of water. The process was monitored by UV after the successive addition (10  $\mu$ L) of 0.132 M sodium borohydride (used as electron injector in this case). The spectra obtained from Ag and Au after electron injection are shown in Fig. 8 (A) and (B).
- b) **Tunability by varying refractive index:** In a quartz cell, 5 mg of the catalyst powder was dispersed in solvents of different refractive index and their interaction with incoming light was again monitored by UV-vis spectroscopy. Different plasmonic peak showed in different solvents and found to be a linear relationship of

the refractive index and plasmonic shift. Corresponding absorbance shift and linear graph is shown in Fig. 9 (A) and (B) for Ag and Au.

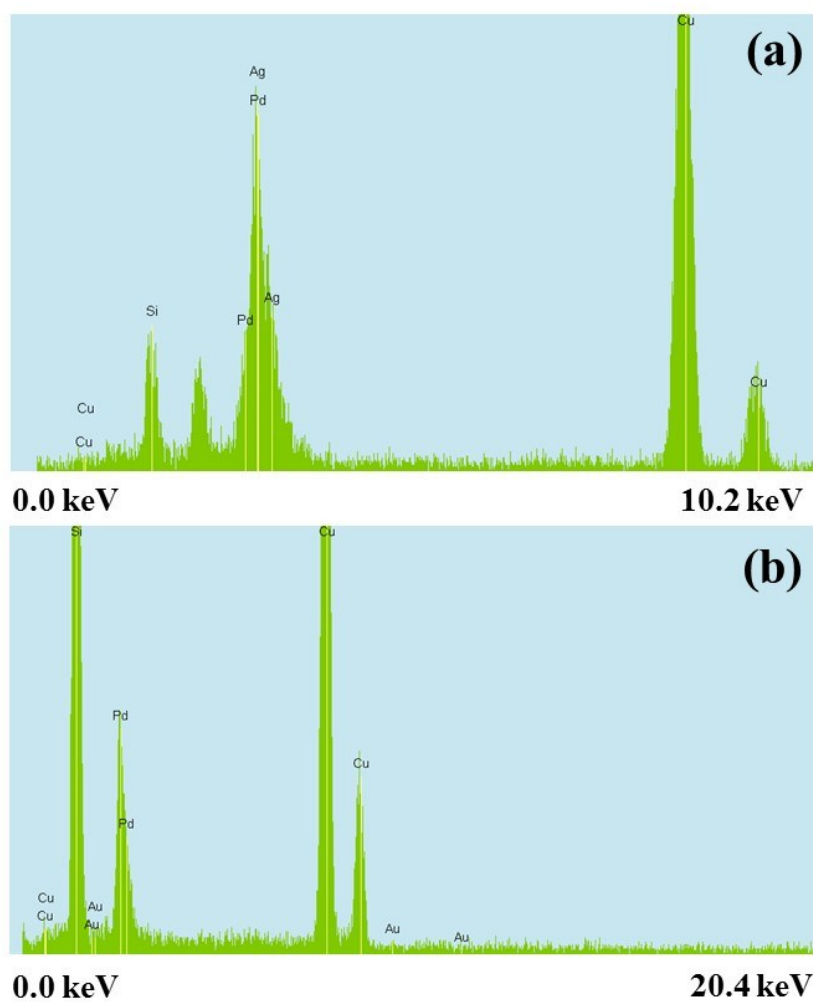

**Figure S7.** TEM-EDX analysis for (a) Pd/Ag/SBA-15 and (b) Pd/Au/SBA-15
